# Supplementary material for: Liver Transplantation for Cholangiocarcinoma: Charting a Path With Lessons Learned From Center Experience
Source: PubMed Central journal article supplement — Transplant Direct. 2021 Mar 22;7(4):e686. doi: 10.1097/TXD.0000000000001133 (PMC8440016; doi:10.1097/txd.0000000000001133), 2021-03-22
Supplement: txd-7-e686-s001.pdf [file txd-7-e686-s001.pdf]

**Table S1: Multivariable Cox Proportional Hazards Regression Model for the Risk of Patient Mortality**

| Variable                                             | Estimate | P-value | Hazard Ratio | 95% CI      |             |
|------------------------------------------------------|----------|---------|--------------|-------------|-------------|
|                                                      |          |         |              | Lower Bound | Upper Bound |
| Age (years)                                          | 0.00     | 0.46    | 1.00         | 0.99        | 1.01        |
| Male gender (ref: female)                            | -0.16    | 0.19    | 0.86         | 0.68        | 1.08        |
| Living donor (ref: deceased)                         | 0.03     | 0.87    | 1.03         | 0.72        | 1.48        |
| Incidental CCA (ref: no)                             | 0.09     | 0.44    | 1.10         | 0.86        | 1.40        |
| MELD exception (ref: no)                             | -0.21    | 0.27    | 0.81         | 0.56        | 1.18        |
| Recent era (ref: before Jan 18 <sup>th</sup> , 2010) | -0.16    | 0.41    | 0.85         | 0.58        | 1.25        |
| MELD exception by era interaction effect             | 0.25     | 0.28    | 1.29         | 0.81        | 2.04        |
| Laboratory MELD score (ref: < 15)                    |          | 0.002   |              |             |             |
| 15 – 19                                              | 0.22     | 0.16    | 1.25         | 0.92        | 1.70        |
| 20 – 24                                              | 0.29     | 0.10    | 1.33         | 0.95        | 1.87        |
| 25 – 29                                              | 0.35     | 0.15    | 1.43         | 0.88        | 2.31        |
| 30 – 34                                              | 0.046    | 0.91    | 1.05         | 0.49        | 2.22        |
| 35 – 39                                              | -0.12    | 0.76    | 0.89         | 0.42        | 1.87        |
| ≥ 40                                                 | 1.30     | < 0.001 | 3.68         | 2.04        | 6.63        |
| Center-level CCA LTs per active year (ref: > 12)     |          | < 0.001 |              |             |             |
| 1                                                    | 0.95     | < 0.001 | 2.58         | 1.66        | 4.03        |
| > 1 and ≤ 2                                          | 0.76     | < 0.001 | 2.14         | 1.53        | 2.99        |
| > 2 and ≤ 4                                          | 0.63     | 0.002   | 1.88         | 1.27        | 2.77        |
| Waiting time (months)                                | 0.00     | 1.00    | 1.00         | 0.99        | 1.01        |

Abbreviations: CCA = cholangiocarcinoma; CI = confidence interval; LT = liver transplantation; MELD = Model for End-Stage Liver Disease; ref = reference group.
